# Supplementary material for: Decreasing cloud cover drives the recent mass loss on the Greenland Ice Sheet
Source: PubMed Central journal article supplement (PMC5489271; doi:10.1126/sciadv.1700584), 2017-06-28
Supplement: 1700584_SM.pdf [file 1700584_SM.pdf]

## Supplementary Materials for **Decreasing cloud cover drives the recent mass loss on the Greenland Ice Sheet**

Stefan Hofer, Andrew J. Tedstone, Xavier Fettweis, Jonathan L. Bamber

Published 28 June 2017, *Sci. Adv.* **3**, e1700584 (2017)

DOI: 10.1126/sciadv.1700584

### **This PDF file includes:**

- fig. S1. Long-term NAO index from observations on Iceland and the Azores (1950–2016) (*19*).
- fig. S2. Extended GBI (1850–2016) (*14*).
- fig. S3. Correlation between JJA cloud cover and LWD anomalies.
- fig. S4. Correlation between summer radiation anomalies and albedo.
- fig. S5. Correlation between annual melt and runoff anomalies.

## Supplementary Materials

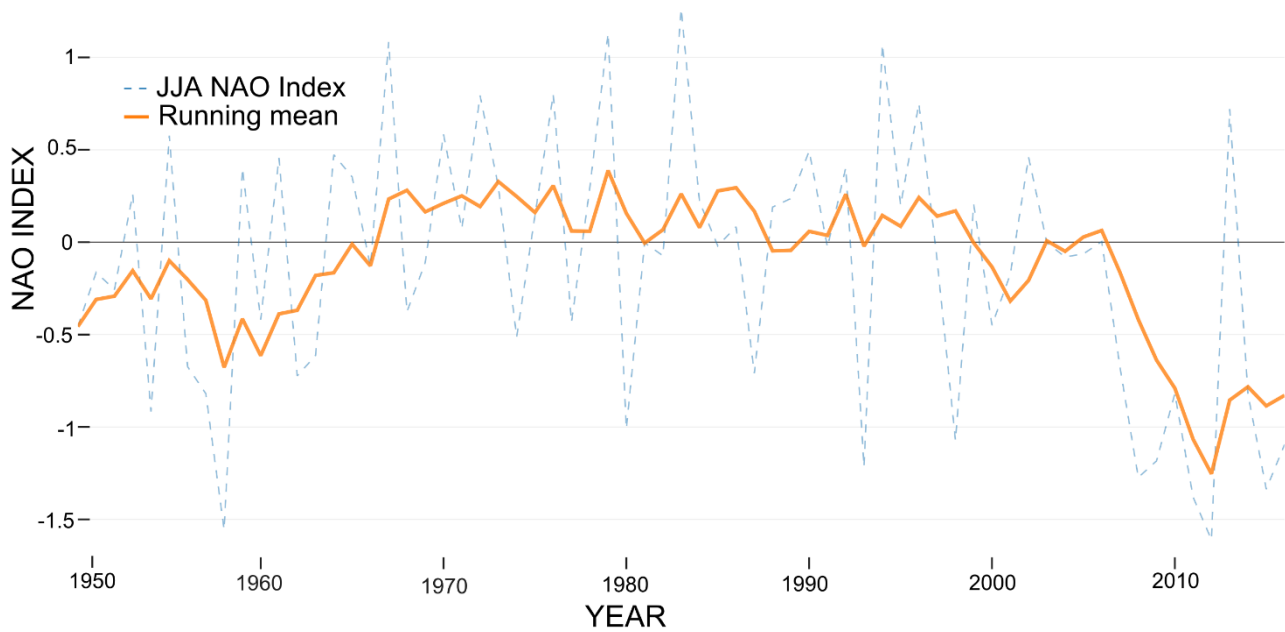

**fig. S1. Long-term NAO index from observations on Iceland and the Azores (1950–2016) (19).** Average JJA NAO index (blue) and 5 year running average (orange) retrieved from observations from the Azores (Ponta Delgada) and Iceland (Reykjavik).

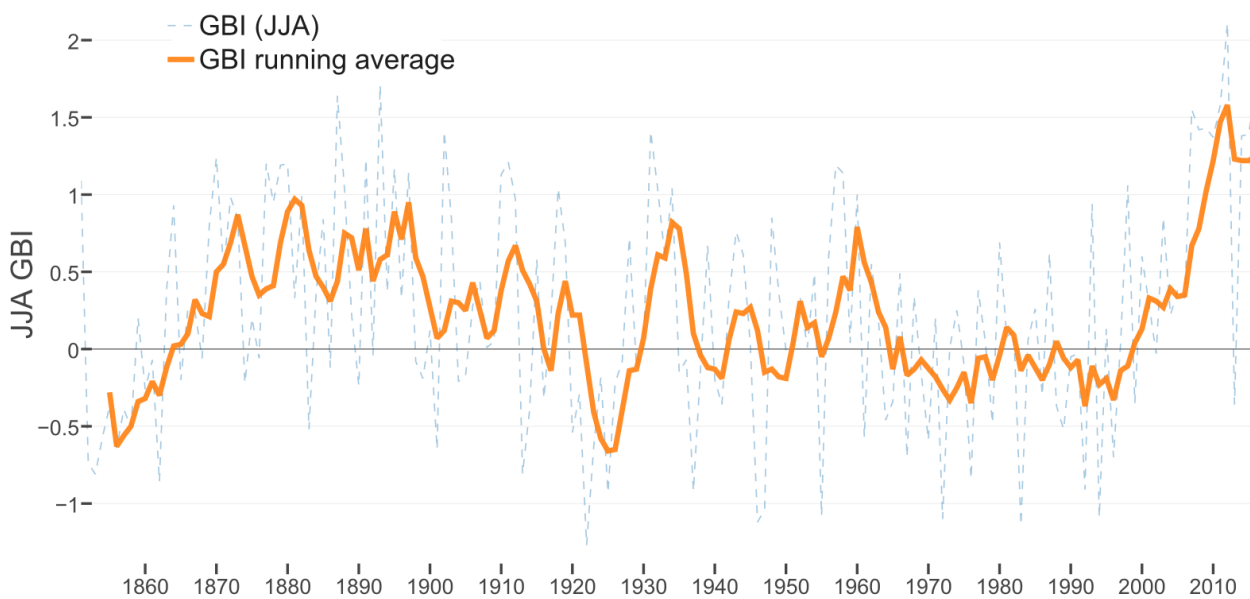

**fig. S2. Extended GBI (1850–2016) (14).** Average JJA GBI from mean 500 hPa geopotential height between 60–80°N and 20–80°W (blue) and 5 year running average GBI (orange).

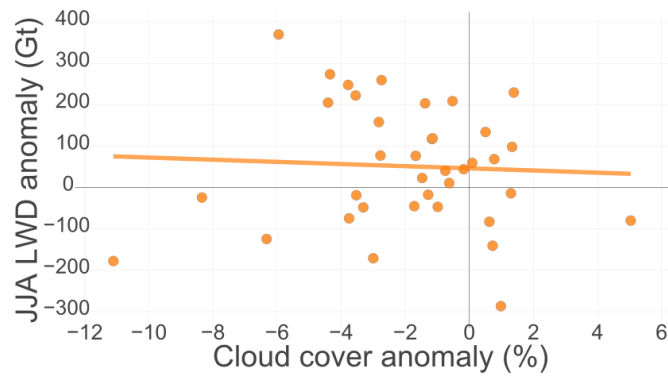

**fig. S3. Correlation between JJA cloud cover and LWD anomalies.** Scatterplot and linear regression line of JJA cloud cover anomalies (%) and JJA longwave downward anomalies (Gt) ( $R^2 = 0.003$ ,  $p = 0.1$ ).

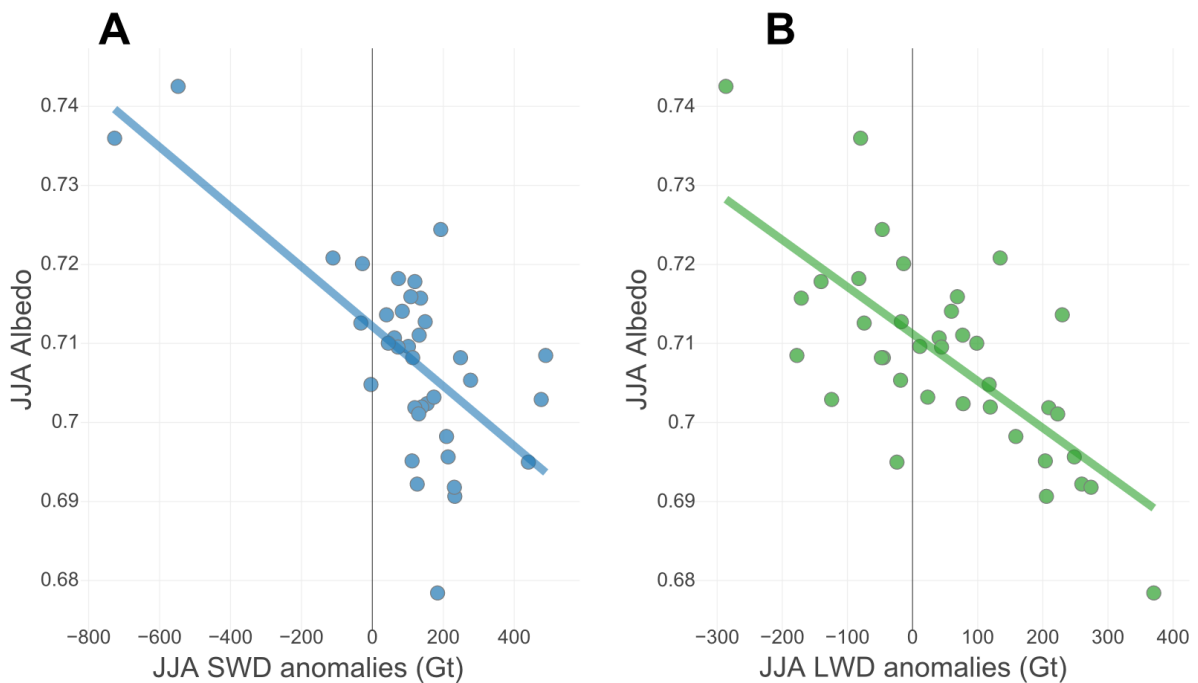

**fig. S4. Correlation between summer radiation anomalies and albedo.** (A), correlation between JJA SWD anomalies since 1979 and GrIS summertime albedo ( $R^2 = 0.46$ ,  $p < 0.001$ ), based on the 1970-1995 climatological mean of MAR, (B), same as A) but showing JJA LWD anomalies and summertime albedo correlation ( $R^2 = 0.50$ ,  $p < 0.001$ ).

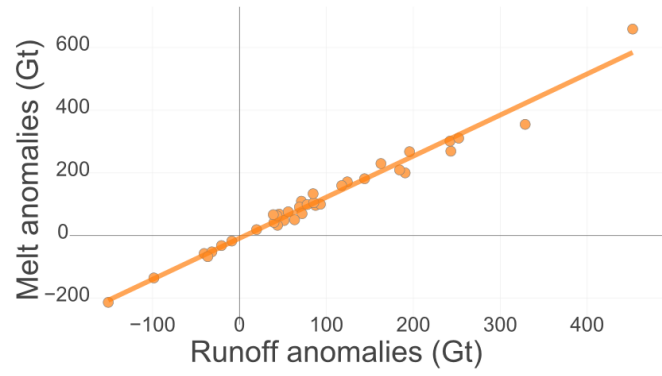

**fig. S5. Correlation between annual melt and runoff anomalies.** Scatterplot of annual melt anomalies against annual runoff anomalies, based on the 1970-1995 average of MAR ( $R^2 = 0.98$ ,  $p < 0.001$ ).
